# Supplementary material for: The structure of F1-ATPase from Saccharomyces cerevisiae inhibited by its regulatory protein IF1
Source: PubMed Central journal article supplement (PMC3603450; doi:10.1098/rsob.120164), 2013-02
Supplement: rsob120164-s1.pdf [file rsob120164-s1.pdf]

**Supplementary information for**

**The structure of F<sub>1</sub>-ATPase from *Saccharomyces cerevisiae*  
inhibited by its regulatory protein IF<sub>1</sub>**

Graham C. Robinson<sup>1</sup>, John V. Bason<sup>1</sup>, Martin G.  
Montgomery<sup>1</sup>, Ian M. Fearnley<sup>1</sup>, David M. Mueller<sup>2</sup>, Andrew G.  
W. Leslie<sup>3</sup> and John E. Walker<sup>1</sup>

*<sup>1</sup>The Medical Research Council Mitochondrial Biology Unit, Hills Road, Cambridge, CB2 0XY, United Kingdom; <sup>2</sup>Rosalind Franklin University of Medicine and Science, The Chicago Medical School, North Chicago, IL, 60064, USA; <sup>3</sup>The Medical Research Council Laboratory of Molecular Biology, Hills Road, Cambridge, CB2 2QH, United Kingdom*

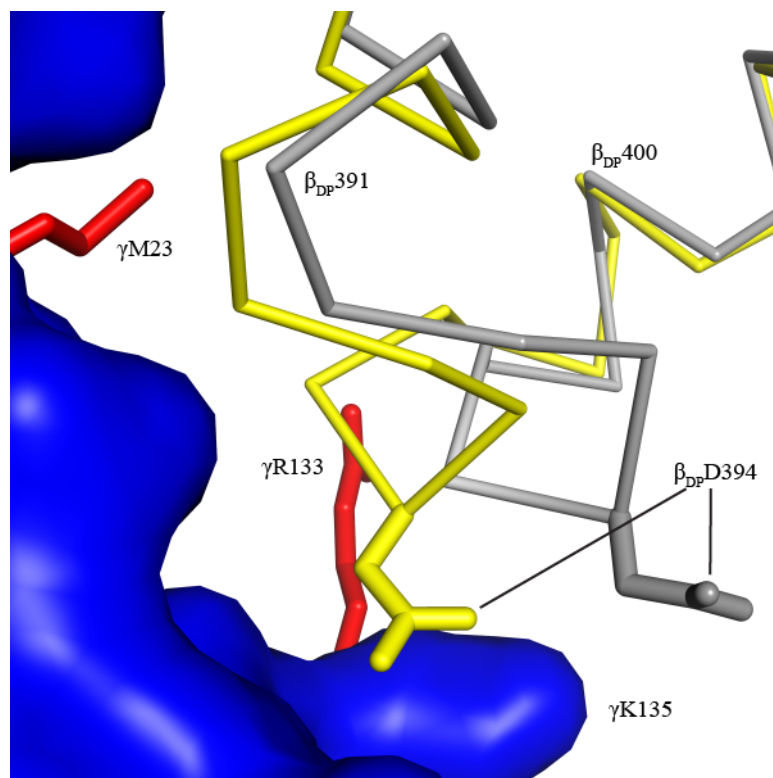

**Fig S1.** A local difference in the structures of bovine F<sub>1</sub>-I<sub>1</sub>-60 and yF<sub>1</sub>-I<sub>1</sub>-53 that accommodates a sequence difference in the yeast and bovine inhibitor proteins. The Figure illustrates the different conformations adopted by residue  $\beta_{DP}$ -D394 in the loop consisting of residues 391-398; the yeast and bovine loops are depicted in yellow and grey stick representation, respectively. Relevant side-chains of the bovine  $\gamma$ -subunit are shown in red, and then surface representation of the yeast  $\gamma$ -subunit is blue. The conformation of the loop containing  $\beta_{DP}$ -D394 in the bovine enzyme is influenced by  $\gamma$ R133 and  $\gamma$ M23 (both red), placing  $\beta_{DP}$ -D394 in a position where it interacts with residue R32 (not shown) in bovine IF<sub>1</sub>. In yeast IF<sub>1</sub>, R32 is replaced by F27 (not shown) forcing  $\beta_{DP}$ -D394 to adopt a different conformation, which is accommodated by a change in the position of the side-chain of yeast  $\gamma$ K135 (blue solid representation), the equivalent of bovine  $\gamma$ R133.

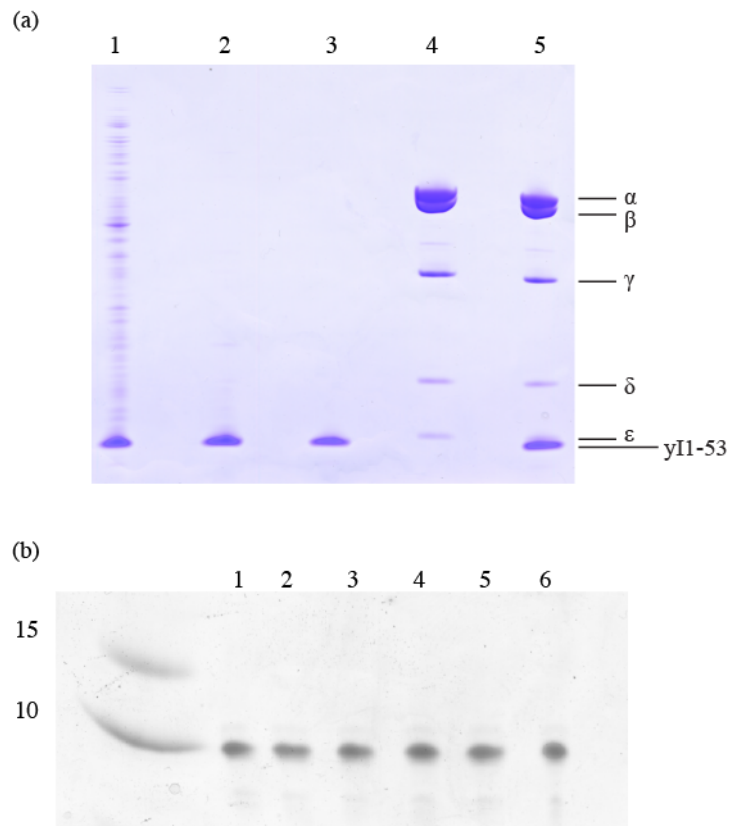

**Fig. S2.** Analysis of proteins. The proteins were analyzed by SDS-PAGE and stained with Coomassie blue dye. Part (a); lane 1, supernatant following breakage of cells of *E. coli* BL21(DE3) expressing the yeast inhibitor protein, I1-53; lanes 2 and 3, samples before and after application to Hi-Trap Q-column, respectively; lane 4, purified yeast F<sub>1</sub>-ATPase; lane 5, the yeast F<sub>1</sub>-I1-53 inhibited complex. Part (b); characterization of mutant proteins of the yeast inhibitor yI1-53His. The proteins contain the following mutations: lane 1, E2A; lane 2, R9A; lane 3, D15A; lane 4, R30A; lane 5, L37A; lane 6, L40A. Molecular weight markers are shown on the left.

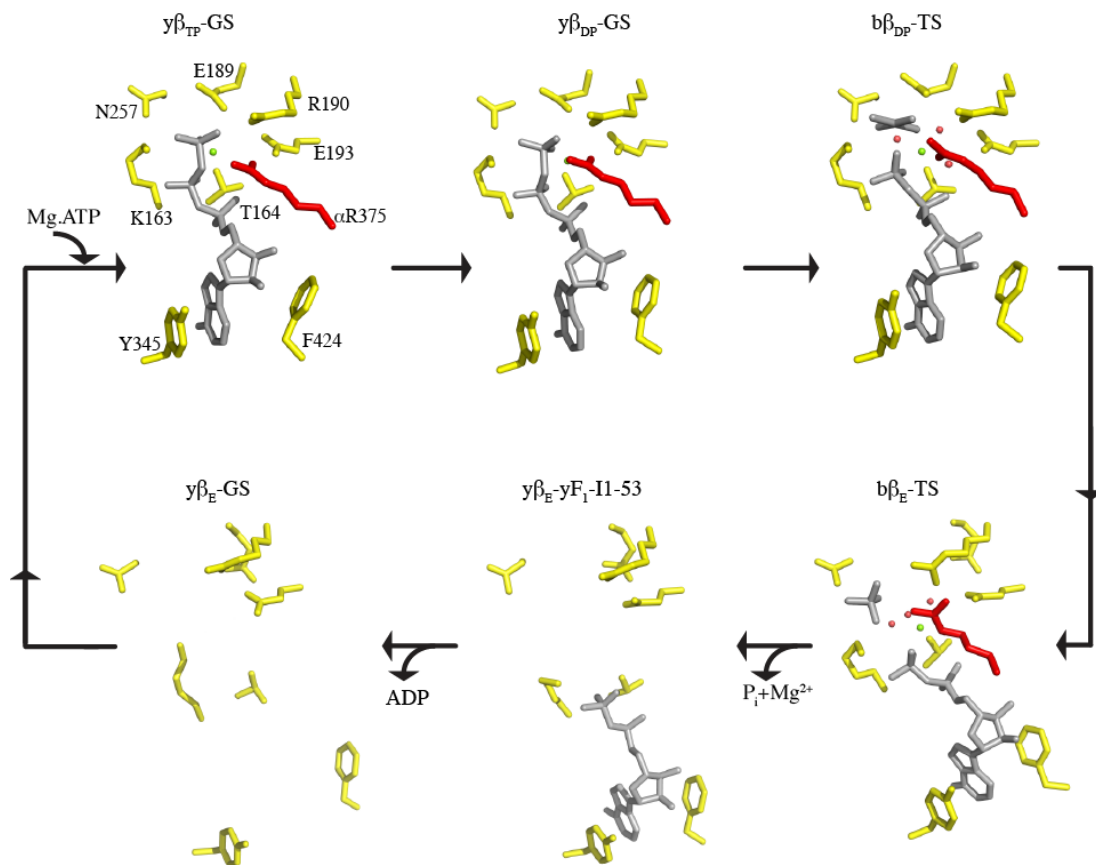

**Fig. S3.** The structural basis of the hydrolysis of ATP by  $F_1$ -ATPase. In the upper and lower rows the conformations of the various subunits are taken from the yeast (y) ground-state (GS) and bovine (b) transition state analog (TS) structures and from the  $\beta_E$ -subunit of the current structure. The  $\beta_E$ -,  $\beta_{TP}$ - and  $\beta_{DP}$ -subunits are placed in the standard order described before [18], conversion from one state to the next requiring a  $120^\circ$  rotary step of the central stalk of the enzyme. In the conversion  $\beta_E$ GS to  $\beta_{TP}$ GS, magnesium.ATP is bound to the catalytic subunit. The next  $120^\circ$  rotation converts  $\beta_{TP}$ GS to  $\beta_{DP}$ GS, the catalytically active site of the enzyme. In the next  $90^\circ$  rotary sub-step (probably), the transition state forms; at this point in the Figure, the bovine subunit,  $b\beta_{DP}$ -TS, is depicted. In the next  $30^\circ$  rotary sub-step (probably), scission of the  $\gamma$ -phosphate of ATP occurs (depicted as the bovine subunit,  $b\beta_E$ -TS), and is followed by the release of the magnesium ion and phosphate, producing the state of the  $\beta_E$ -subunit in the current structure. Finally, the nucleotide is released, regenerating

$\gamma\beta_E$ -GS. The magnesium ion and the nucleotide are shown in green and grey respectively, and arginine finger residue  $\alpha R375$  is red. In the bovine  $b\beta_{DP}$ -TS and  $b\beta_E$ -TS structures the red spheres represent water molecules involved in coordination of the magnesium ion. In  $b\beta_{DP}$ -TS and  $b\beta_E$ -TS, the  $AlF_4^-$  and phosphate moieties are depicted in grey.

**Table S1. Molecular masses of subunits of F<sub>1</sub>-ATPase from *S. cerevisiae* and of yeast inhibitor proteins.**

| Protein       | Mass (Da) |            | Mass difference | Modification |
|---------------|-----------|------------|-----------------|--------------|
|               | Observed  | Calculated |                 |              |
| $\alpha$      | 54950.6   | 54944.7    | + 5.9           | None         |
| $\beta$       | 51131.6   | 51126.4    | + 5.2           | None         |
| $\gamma$      | 30618.4   | 30616.2    | + 2.2           | None         |
| $\delta$      | 14554.1   | 14553.5    | + 0.6           | None         |
| $\epsilon$    | 6611.6    | 6611.4     | + 0.2           | None         |
| I1-63         | 7383.6    | 7383.2     | + 0.4           | None         |
| I1-53         | 6165.2    | 6164.8     | + 0.4           | None         |
| I1-53His      | 6987.8    | 6987.7     | + 0.1           | None         |
| E2A I1-53His  | 6930.0    | 6929.6     | + 0.4           | None         |
| R9A I1-53His  | 6902.4    | 6902.5     | - 0.1           | None         |
| D15A I1-53His | 6944.0    | 6943.6     | + 0.4           | None         |
| R30A I1-53His | 6902.5    | 6902.5     | 0               | None         |
| L37A I1-53His | 6946.1    | 6945.6     | + 0.5           | None         |
| L40A I1-53His | 6946.1    | 6945.6     | + 0.5           | None         |

Subunits of F<sub>1</sub>-ATPase were separated by reverse phase chromatography, and their masses were measured “on-line” by ESI-MS. Calculated values are based on the mature protein sequences. All of the yeast inhibitor proteins contain the mutation E21A.
